# Supplementary material
Source: Springer Nature journal article supplement (https://www.springermedizin.de/resource/supplementary/12990_2009_215_MOESM2_ESM.pdf/9612808)

Morphine per kg bodyweight

○ Chinese  
△ Malay  
+ Indian

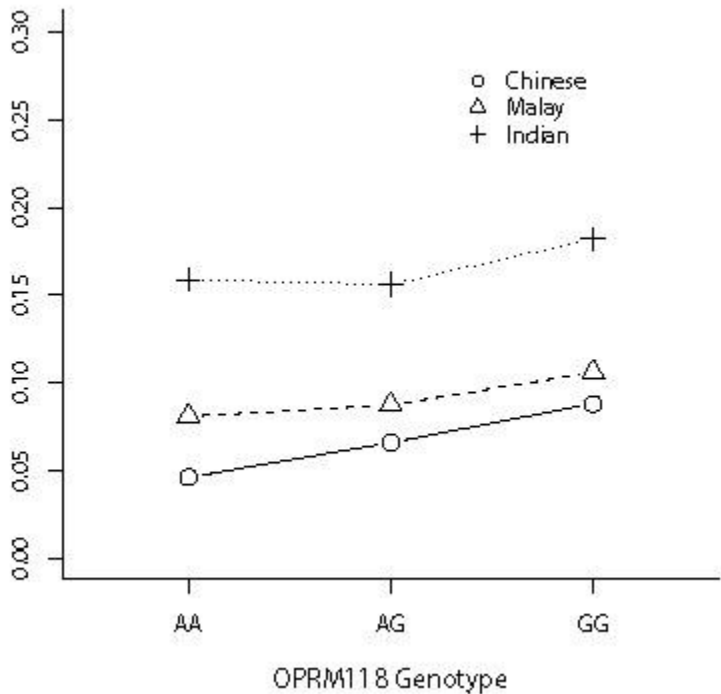

Supplement: MOESM2 [file 9612808]
